# Supplementary material
Source: PubMed Central journal article supplement (PMC9606384)
Supplement: mmc3.pdf [file mmc3.pdf]

**Supplemental Data 2.** Splicing diagrams and nucleotide sequence of exon-exon RT-PCR products of genes showing abnormal splicing events around U12 introns in SCNM1-deficient cells.

For each gene, the sequence of RT-PCR products corresponding to normally, or alternatively (aberrant) spliced transcripts (designated with numbers), together with a schematic representation (not to scale) of splicing events is included. Exons are designated with boxes and introns with lines. U12 introns are specified with a red line and exons flanking U12 introns are in blue and green. In the case of *DERL2*, which has 2 contiguous U12 introns, only the one found as significantly retained in SCNM1-deficient fibroblasts through bioinformatics analysis is between blue and green exons. Dotted lines indicate splicing junctions and the nucleotide sequences of relevant 5' and 3' splice sites around U12 introns are indicated. The cDNA sequence of each transcript is shown below its corresponding diagram. Different code of letters was used: blue and black for canonical exons (capital letters), and red (lower case letters) for U12 intronic sequences incorporated into transcripts. Additionally, in the case of variant 2 of both, *FAM92A* and *RABL2B*, purple color was used to separate splicing events occurring within U12 introns. For *DERL2* and *ZC3H8*, nucleotides which are not present in some of the aberrant isoforms are underlined in the sequence of the normally spliced transcript.

Abbreviations: CU12IR (Complete U12 Intron Retention), A5SS (Activation of cryptic 5' Splice Site [within U12 intron or adjacent exons]), A3SS (Activation of cryptic 3' Splice Site [within U12 intron or adjacent exons]), ES (Exon Skipping) and CEI (Cryptic Exon Inclusion).

### AHCTF1

>Normally spliced transcript (NM\_015446.5). Nucleotide sequence extends from exon 16 to exon 21.

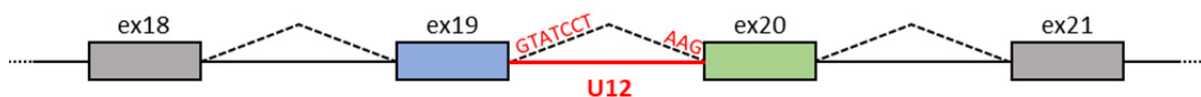

```
GGGCTTTTACCAGAAGGCATAGATGATTCTGTGCAGTTGTCAAGGTTATGCTACAACCTACCCTG
TAATTCAGAACTACTACACCAGTCGTCGACAGAAGTTTGAGCGTTTATCAAGAGGGAAGTGGAA
TCCCGATTGCTTGATGATTGATGGACTGGTTTCTCAGTTAGGAGAGCGAATTGAGAAGTTGTGG
AAACGAGATGAAGGAGGCACAGGAAAATATCCTCCTGCTAGTCTGCATGCAGTACTTGATATGT
ACCTATTAGACGGCGTTACTGAAGCAGCCAAACACTCTATTACCATTTATTTGCTACTTGATAT
TATGTATTCCCTTTCCCAACAAAACAGACACTCCCATTGAATCTTTCCCAACTGTATTTGCCATT
```

TCTTGGGGCCAAGTTAAACTTATTCAGGGGTTTTGGTTGATAGATCATAATGACTATGAGAGTG  
 GTTTGGATCTTTTGTTCATCCAGCTACTGCAAACCTTTGTCATGGCAACATTCAAAGATTAT  
 TCAGGCATTCATGAGTCAGGGCG

>1 (CU12IR)

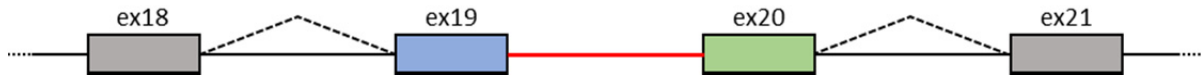

GGGCTTTTACCAGAAGGCATAGATGATTCTGTGCAGTTGTCAAGGTTATGCTACAACACTACCCTG  
 TAATTCAGAACTACTACACCAGTCGTCGACAGAAGTTTGAGCGTTTATCAAGAGGGAAAGTGGAA  
 TCCCGATTGCTTGATGATTGATGGACTGGTTTCTCAGTTAGGAGAGCGAATTGAGAAGTTGTGG  
 AAACGAGATGAAGGAGGCACAGGAAAATATCCTCCTGCTAGTCTGCATGCAGTACTTGATATGT  
 ACCTATTAGACGGCGTTACTGAAGCAGCCAAACACTCTATTgtatccttttaagttttatccag  
 tgtttcatgtattactaaaattataaaatttcaagagtagtggaacctgacatatctaattgc  
 aaggttgaattttggttttgttttcttaagaagaggtgtaaccaggatctgttgttgggt  
 cagatggcctgtgatcaacctaaaactataatgaaaaatttgttttttatttgttttctaggt  
 atagggtacttggcttttatcagacacttaaagtgtgtccaagacactcaaaaagttaacaacag  
 ttgctctaaaatactaccaccaagtggcactatcaatggcattaacctctgtgctggaatga  
 atacattataagttagcgtgatactaccttaggcattatttgagtcctatagtctttgtgataa  
 tatttttgtgctaattgttagtacttagtctaaaaatgtataattccatttataattataagc  
 tagatgatgtttgattaagctgccatcttttgctagatctttagaaatttgcgtataatctttgt  
 ttcttgtatttactgagctactgacttcataaaaatacgtttatctcctttgtgggtgctgata  
 ataaaatactgagaatgaatgaagttgggtgcgggactgggtgtaccacatttactaaaactat  
 cttctcattgctgactctccatgatggctttctaaacactaaaaacaggcatttcaagtctctt  
 ttaatgctacattttgttgcctatttgtaatatatacgtaggaggtttttgttgttatt  
 ttattgtccttaatccgcttttttaaagACCATTTATTTGCTACTTGATATTATGTATTCCTTT  
 CCCAACAAAACAGACACTCCCATTTGAATCTTTCCCAACTGTATTTGCCATTTCTTGGGGCCAAG  
 TTAAACTTATTCAGGGGTTTTGGTTGATAGATCATAATGACTATGAGAGTGGTTTGGATCTTTT  
 GTTTCATCCAGCTACTGCAAACCTTTGTCATGGCAACATTCAAAGATTATTCAGGCATTCATG  
 AGTCAGGGCG

C17orf75

>Normally spliced transcript (NM\_022344.4). Nucleotide sequence extends from exon 3 to exon 8.

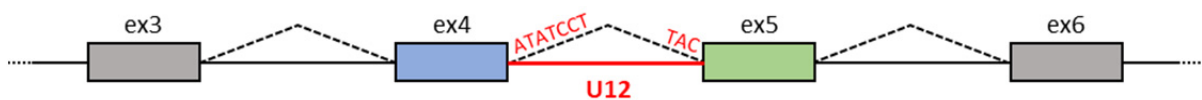

CTACCATCCGAAGTGGAGCCAGAGCTGCGCAGTTTCATTGCTAAGCGTCTTTCAAGAGGTGCAG  
 TCTTTGAAGGGCTGGGTAATGTTGCATCTGTGGAGCTAAAAATTCCAGTTACCGAGTTGGTTG  
 TTATTACTGCCTTTTCCAAAATGAAAACTGCTTCTGAAACAGTAACGATAGACTCTGAACGT  
 AACCTTCAGAATATGTGGTCTGTTTTTTAGGAGGGTCTGAAAAAGGACTTGAGCTTTTCAGGC  
 TTGAATTGGACAAGTACATTC AAGGGCTGAAAAATAACATGAATTGTGAGGCAAGGGGCCTGGA  
 GAGTCACATAAAATCCTATCTGAGCAGCTGGTTTTGAGGATGTTGTATGCCAATCCAAAGGGTT  
 GTTCTTCTCTTTCAGGAAAAGCTTACCTTCTGCTACATGCTGCTTTGAGTTACACTCCTGTTG  
 AAGTTAAAGAATCAGATGAAAAACAAAGAGAGACATTAACAGTTTTCTGAGTGTGGCCAGTCT  
 TCAAGGAC

>1 (CU12IR)

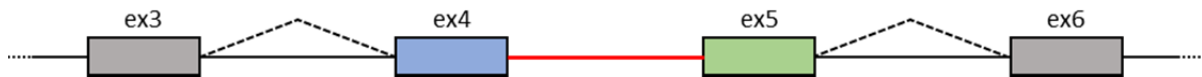

```
CTACCATCCGAAGTGGAGCCAGAGCTGCGCAGTTTCATTGCTAAGCGTCTTTCAAGAGGTGCAG
TCTTTGAAGGGCTGGGTAATGTTGCATCTGTGGAGCTAAAAATTCCAGTTACCGAGTTGGTTG
TTATTACTGCCTTTTCCAAAATGAAAACTGCTTCCTGAAACAGTAACGATAGACTCTGAACGT
AACCCCTTCAGAATATGTGGTCTGTTTTTTTAGGAGGGTCTGAAAAAGGACTTGAGCTatatacctt
tctttggtttttgagaacatcaggaaggaaaacatgggaaggcaggtggaagaatattactacc
aacctccaaaaagcttttctactcctcgtgtatthtagttgaatttcataccttcatgtggccat
tttgctttggcttggtttgcatttgcagctcacattatthgagagattttatatttctgttgag
agatgaaatactgtcttcattattcatcctttattgcttccttaagaacatacTTTCAGGCTTG
AATTGGACAAGTACATTCAAGGGCTGAAAAATAACATGAATTGTGAGGCAAGGGGCTGGAGAG
TCACATAAAATCCTATCTGAGCAGCTGGTTTGAGGATGTTGTATGCCCAATCCAAAGGGTTGTT
CTTCTCTTTTCAGGAAAAGCTTACCTTTCTGCTACATGCTGCTTTGAGTTACACTCCTGTTGAAG
TTAAAGAATCAGATGAAAAAACAAAGAGAGACATTAACAGGTTTCTGAGTGTGGCCAGTCTTCA
AGGAC
```

### DCTN3

>Normally spliced transcript (NM\_007234.5). Nucleotide sequence extends from exon 5 to exon 7.

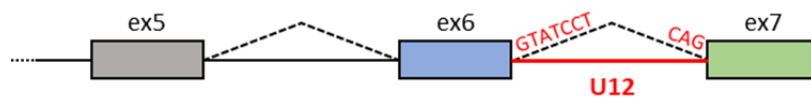

```
GCTTGGCCCAGATCCACATTCAGCAGCAGGACCAGTGTGTGGAAATCACTGAGGAGTCCAAGGC
TCTCCTGGAGGAATACAACAAGACTACAATGCTTCTCTCCAAGCAATTCGTGCAGTGGGATGAG
CTACTTTGCCAGCTAGAGGCCGCCACGCAAGTGAAGCCAGCAGAGGAGTGATAGCTGCTCCCA
TCCCAAAGTGGGCCTGGGCAGTCAGGCTCCAGGGCCCTATGCCAACCTGCCTTT
```

>1 (CU12IR)

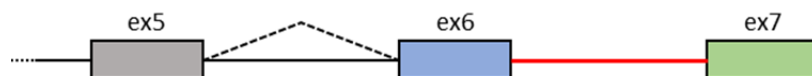

```
GCTTGGCCCAGATCCACATTCAGCAGCAGGACCAGTGTGTGGAAATCACTGAGGAGTCCAAGGC
TCTCCTGGAGGAATACAACAAGACTgtatcctttctgctcaactaggaccctaattgggtgctgt
ccctaagccctgtccttttgttccacctctagctctctctcatcctatcctaccacctaattgtt
tgctgtttcccactttccatgaacttctcactcagattcctattctcaccttgacctacaac
cagACAATGCTTCTCTCCAAGCAATTCGTGCAGTGGGATGAGCTACTTTGCCAGCTAGAGGCCG
CCACGCAAGTGAAGCCAGCAGAGGAGTGATAGCTGCTCCCATCCCAAAGTGGGCCTGGGCAGT
CAGGCTCCAGGGCCCTATGCCAACCTGCCTTT
```

### DERL2

>Normally spliced transcript (NM\_016041.5). Nucleotide sequence extends from exon 1 to exon 6.

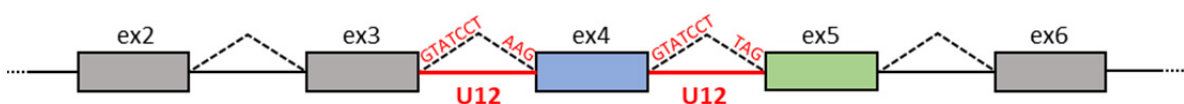

ATGGCGTACCAGAGCTTGCGGCTGGAGTACCTGCAGATCCCACCGGTCAGCCGCGCCTACACCA  
 CTGCCTGCGTCCTCACCACCGCCGCCGTGCAGTTGGAATTGATCACACCTTTTCAGTTGTACTT  
 CAATCCTGAATTAATCTTTAAACACTTTCAAATATGGAGATTAATCACCAACTTCTTATTTTTT  
 GGGCCAGTTGGATTCAATTTTTTATTTAACATGATTTTTTCTATATCGTTACTGTGCGAATGCTAG  
 AAGAAGGCTCTTTCCGAGGTCGGACAGCAGACTTTGTATTTATGTTTCCTTTTTGGTGGATTCTT  
 AATGACCCTTTTTGGTCTGTTTGTGAGCTTAGTTTTCTTGGGCCAGGCCTTACAATAATGCTC  
 GTCTATGTGTGGAGCCGAAGGAACCCCTATGTCCGCATGAACTTCTTCGGCCTTCTCAACTTCC  
 AGGCCCCCTTCTGCCCTGGGTGCTCATGGGATTTTTCTTGTGTTGGGGAACCTCAATCATTGT  
 GGACCTTTTGGGTATTGCAGTTGGACACATATATTTTTTTCTTGGGAAGATGTATTTCCCAATCAA  
 CCTGGTGGA

>1 (CU12IR)

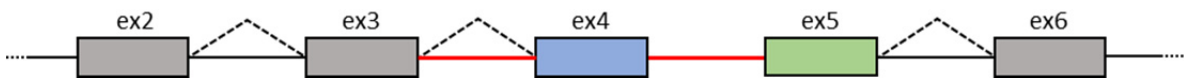

ATGGCGTACCAGAGCTTGCGGCTGGAGTACCTGCAGATCCCACCGGTCAGCCGCGCCTACACCA  
 CTGCCTGCGTCCTCACCACCGCCGCCGTGCAGTTGGAATTGATCACACCTTTTCAGTTGTACTT  
 CAATCCTGAATTAATCTTTAAACACTTTCAAATATGGAGATTAATCACCAACTTCTTATTTTTT  
 GGGCCAGTTGGATTCAATTTTTTATTTAACATGATTTTTTCTATATCGTTACTGTGCGAATGCTAG  
 AAGAAGGCTCTTTCCGAGGTCGGACAGCAGACTTTGTATTTATGTTTCCTTTTTGGTGGATTCTT  
 AATGACCgtatccttcaacaacaacacgggaaaatggtgaagaacacacctggctcttcctaaa  
 gcttgatctgtctcccacagttctctagatcttagcttcagggcactatcatttattttaca  
 gcacattttctgtgacaagtttccaaacctagcagtcggacaggatgagcaagtcaaaggaact  
 ttaaccaggtgggttaactgttaagcaactcagttatatcattactgcttggcgtacttcaact  
 ttaaaactaagttggttaagacatttacttgggtggtacccaaaaccaataaattatTTTTTcaga  
 aaaagaattttcatctatacaatagacttagatatggtacggctctgacaagatggTTTTgttcc  
 agctagctttattcatctctgtaaagggtgctaatacgtgagcaagctttaataaattattgact  
 gaagaattaacacattttccaaagaggcaagaacttcacgaaagcagagtatttgtttgaagta  
 gctgtaaatctcgataatttagcctaagcagatttttgcctgattgctctgggtaattattttc  
 tgggtgtttctccttctattctaaagatgtaacaacttgacttttccaatcaaacctctgtta  
 gaacacaatcttagttctcctgctcagcttttctattaaacttttaatggtgatattttcct  
 taatgccatctgtagCTTTTTGGTCTGTTTGTGAGCTTAGTTTTCTTGGGCCAGGCCTTACA  
 ATAATGCTCGTCTATGTGTGGAGCCGAAGGAACCCCTATGTCCGCATGAACTTCTTCGGCCTTC  
 TCAACTTCCAGGCCCTTCTGCCCTGGGTGCTCATGGGATTTTTCTTGTGTTGGGGAACCTC  
 AATCATTGTGGACCTTTTGGGTATTGCAGTTGGACACATATATTTTTTTCTTGGGAAGATGTATTT  
 CCAATCAACCTGGTGGA

>2 (A5SS & A3SS)

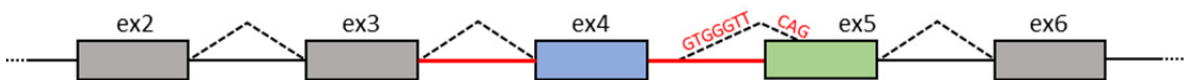

ATGGCGTACCAGAGCTTGCGGCTGGAGTACCTGCAGATCCCACCGGTCAGCCGCGCCTACACCA  
 CTGCCTGCGTCCTCACCACCGCCGCCGTGCAGTTGGAATTGATCACACCTTTTCAGTTGTACTT  
 CAATCCTGAATTAATCTTTAAACACTTTCAAATATGGAGATTAATCACCAACTTCTTATTTTTT  
 GGGCCAGTTGGATTCAATTTTTTATTTAACATGATTTTTTCTATATCGTTACTGTGCGAATGCTAG  
 AAGAAGGCTCTTTCCGAGGTCGGACAGCAGACTTTGTATTTATGTTTCCTTTTTGGTGGATTCTT  
 AATGACCgtatccttcaacaacaacacgggaaaatggtgaagaacacacctggctcttcctaaa  
 gcttgatctgtctcccacagttctctagatcttagcttcagggcactatcatttattttaca  
 gcacattttctgtgacaagtttccaaacctagcagtcggacaggatgagcaagtcaaaggaact

tttaaccagGCCTTTACAATAATGCTCGTCTATGTGTGGAGCCGAAGGAACCCCTATGTCCGC  
 ATGAACTTCTTCGGCCTTCTCAACTTCCAGGCCCTTCTGCCCCTGGGTGCTCATGGGATTTT  
 CCTTGTTGTTGGGAACTCAATCATTGTGGACCTTTTGGGTATTGCAGTTGGACACATATATTT  
 TTTCTTGAAGATGTATTTCCCAATCAACCTGGTGA

>3 (ES [Ex4])

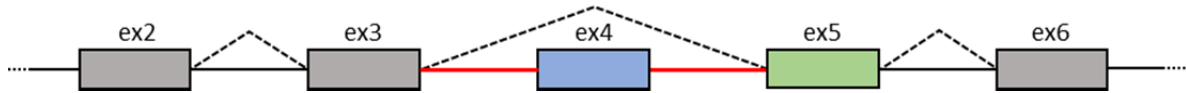

ATGGCGTACCAGAGCTTGC GGCTGGAGTACCTGCAGATCCCACCGGTCAGCCGCGCCTACACCA  
 CTGCCTGCGTCCTCACCACCGCCGCGGTGCAGTTGGAATTGATCACACCTTTTCAGTTGTACTT  
 CAATCCTGAATTAATCTTTAAACACTTTCAAATATGGAGATTAATCACCAACTTCTTATTTTTT  
 GGGCCAGTTGGATTCAATTTTTTATTTAAACATGATTTTTCTCTTTTTGGTCTGTTTGTGAGCTT  
 AGTTTTCTTGGGCCAGGCCTTTACAATAATGCTCGTCTATGTGTGGAGCCGAAGGAACCCCTAT  
 GTCCGCATGAACTTCTTCGGCCTTCTCAACTTCCAGGCCCTTCTGCCCCTGGGTGCTCATGG  
 GATTTTCTTGTGTTGGGAACTCAATCATTGTGGACCTTTTGGGTATTGCAGTTGGACACAT  
 ATATTTTTTCTTGAAGATGTATTTCCCAATCAACCTGGTGA

>4 (ES [Ex3, Ex4 & Ex5])

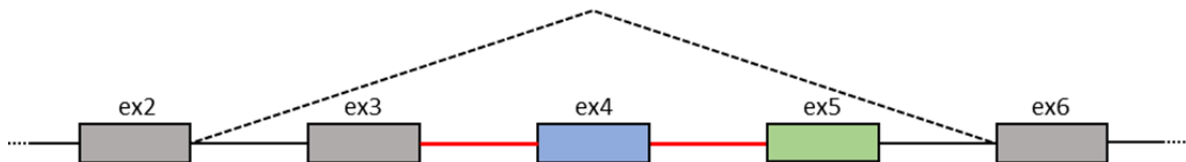

ATGGCGTACCAGAGCTTGC GGCTGGAGTACCTGCAGATCCCACCGGTCAGCCGCGCCTACACCA  
 CTGCCTGCGTCCTCACCACCGCCGCGGTGCAGTTGGAATTGATCACACCTTTTCAGTTGTACTT  
 CAATCCTGAATTAATCTTTAAACACTTTCAAATATTGCAGTTGGACACATATATTTTTTCTTGG  
 AAGATGTATTTCCCAATCAACCTGGTGA

DOCK1

>Normally spliced transcript (NM\_001290223.2). Nucleotide sequence extends from exon 39 to exon 45.

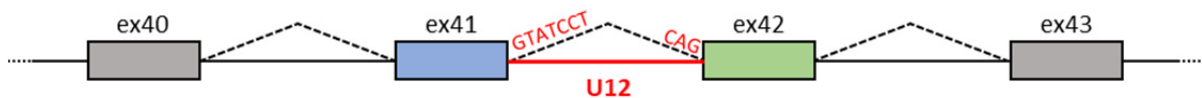

GCCGAGCAGTATGAGAACGAAATGTTTGATTATGAGCAACTCAGCGAATTGCTGAAAAACAGG  
 CTCAGTTTTATGAAAACATCGTCAAAGTGATCAGGCCCAAGCCTGACTATTTTGCTGTTGGCTA  
 CTACGGACAAGGGTTCCCCACATTCCTGCGGGGAAAAGTTTTCAATTACCGAGGGAAAGAGTAT  
 GAGCGCCGGGAAGATTTTGAGGCTCGGCTCTTAACTCAGTTTCCAAACGCCGAGAAAATGAAGA  
 CAACATCTCCACCAGGCGACGATATAAAAACTCTCCTGGCCAGTATATTCAGTGCTTCACAGT  
 GAAGCCCAAACCTCGATCTGCCTCCTAAGTTTCACAGGCCAGTGTGAGAGCAGATTGTAAGTTTT  
 TACAGGGTGAACGAGGTCCAGCGATTTGAATATTCTCGGCCAATCCGGAAGGGAGAGAAAACC  
 CAGACAATGAATTTGCGAATATGTGGATCGAGAGAACCATATATACTGCATATAAATTACC  
 TGGAAATTTAAGGTGGTTTGGAGTCAAGTCTGTTTTTCATGGTGGAAATCAGCCCCCTGGAGAAT  
 G

>1 (CU12IR)

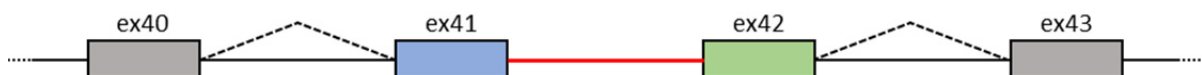

CCCGAGCAGTATGAGAACGAAATGTTTGGATTATGAGCAACTCAGCGAATTGCTGAAAAACAGG  
 CTCAGTTTTATGAAAACATCGTCAAAGTGATCAGGCCCAAGCCTGACTATTTTGTGTTGGCTA  
 CTACGGACAAGGGTTCCCCACATTTCCTGCGGGGAAAAGTTTTTCATTTACCGAGGGAAAAGAGTAT  
 GAGCGCCGGGAAGATTTTGGAGCTCGGCTCTTAACTCAGTTTCCAAACGCCGAGAAAATGAAGA  
 CAACATCTCCACCAGGCGACGATATTA AAAACTCTCCTGGCCAGTgtatcctttaagacaacct  
 catcaactctgaaacctggtgatgccattcatttgggtggttgggtggtggtgggggctctc  
 tcatggttgatgtctatgctgccttagtgatccttaacccctcacctcagATATTCAGTGCTT  
 CACAGTGAAGCCAAACTCGATCTGCCTCCTAAGTTTCACAGGCCAGTGTTCAGAGCAGATTGTA  
 AGTTTTTACAGGGTGAACGAGGTCCAGCGATTTGAATATTCTCGGCCAATCCGGAAGGGAGAGA  
 AAAACCCAGACAATGAATTTGCGAATATGTGGATCGAGAGAACCATATATACA ACTGCATATAA  
 ATTACCTGGAATTTAAGGTGTTTTGAGGTCAAGTCTGTTTTTCATGGTGGAATCAGCCCCCTG  
 GAGAATG

**FAM92A (CIBAR1)**

>Normally spliced transcript (NM\_145269.5). Nucleotide sequence extends from exon 2 to exon 7.

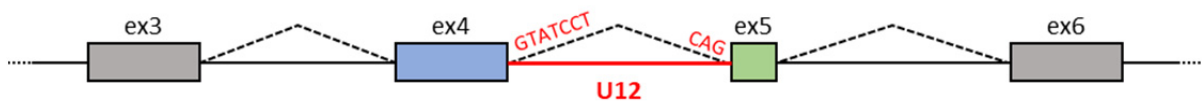

GCTACAGAGACCCCGCATTTAAAGCTGGGCCTGATGAACTTTCAGATGAGTTTGCCAACTTC  
 AGGATTATCGACAAGCAGAGGTTGAAAGACTTGAAGCCAAAGTAGTTGAACCCTTGAAACTTA  
 TGGGACCATTGTGAAAATGAAACGGGATGACCTCAAAGCAACACTCACAGCAAGGAATCGAGAA  
 GCTAAGCAATTA ACTCAGTTAGAAAGAACACGTCAGCGAAACCCATCTGATCGACATGTTATTT  
 CACAGGCAGAAACGGAATTACAGAGAGCTGCAATGGATGCTAGCCGAACAAGTCGTCATCTGGA  
 GGAAACTATTAACA ACTTTGAAAGGCAGAAAATGAAGGATATAAAGACTATATTTTCTGAATTT  
 ATCACAATCGAAATGTTATTTACGGCAAAGCTTTAGAGGTCTACACTGCTGCCTACCAGA

>1 (A5SS & ES [Ex5])

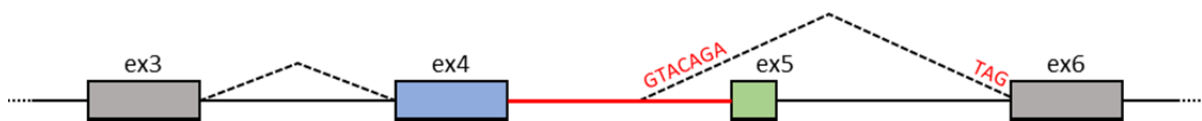

GCTACAGAGACCCCGCATTTAAAGCTGGGCCTGATGAACTTTCAGATGAGTTTGCCAACTTC  
 AGGATTATCGACAAGCAGAGGTTGAAAGACTTGAAGCCAAAGTAGTTGAACCCTTGAAACTTA  
 TGGGACCATTGTGAAAATGAAACGGGATGACCTCAAAGCAACACTCACAGCAAGGAATCGAGAA  
 GCTAAGCAATTA ACTCAGTTAGAAAGAACACGTCAGCGAAACCCATCTGATCGACATGTTATTg  
 tatcctttgaatttgggtctttaaaaaatgtttaaggatggagtacaaaagtaaatgtatat  
 agaaattgtgcatttttacttttaaacgagtagagaatttgaatataaagattgaaaagaatg  
 catttaggaattctcactatagaaattttaagaggttacgccacctaattcaaatcccttat  
 attgttttacacagtagactttgcaaacgaacaacaaaaaattcagatgttttataaacagt  
 aattcaaatctgaattttatcttccacatggtgatgactaaatattaattctacaattaag  
 atctattgtaatcctaataatcagtgctctctatgccctgctttgagaaaaggaaagaaat  
 tttccatttaatttcttcatcttttagaaataaaacaactatgtgacatcatgacttccagc  
 cagttaacctcaggagtcttaagagtataattaagatccaagttggacacaaacctagaaagga  
 ctgtctactataacaagggtcttctgttaaacatgactttcttaactacaatgtgccttggtc  
 gtgagtaaacaaaagcatacaaaatagtgcttaattgccagcaactgagatgggtaggactgtg

tagaaagcactaacatctggctgggcgtggtggctcgtgctgtaattccagcactttgggagg  
 ccgaggcaggcagatcatgaggtcaggagttcgagaccagcctggccaacatagtgaaacctg  
 tcttactaaaaatacaaaaattagccagcatggtagtacacacctgtagtcccagctacttg  
 ggaggctgaggcaagagaatcgcttgaacgtgggagatggagggtgtggtgagctgagatcaca  
 cactgcactccagcctggaaaacaaagcgagactatctcaaaaaaaaaaaaaagaaaagagaa  
 agaaagcactaacatccctactgctctttttccattccttcttctatatgtctccttctgc  
 ttcttaaggttgttactgccagctcagccagaaaccacatgaggagtggctctttgagagca  
 tttgaggttcagaaacacctccattcctgaggggagtctcttgagcagcgatttggggctgcgc  
 cagttgcttggctcttcttcttcttggaccaagGCAGAAACGGAATTACAGAGAGCTGCAATGG  
 ATGCTAGCCGAACAAGTCGTCATCTGGAGGAACTATTAACAACCTTTGAAAGGCAGAAAATGAA  
 GGATATAAAGACTATATTTTCTGAATTTATCACAATCGAAATGTTATTTACGGCAAAGCTTTA  
 GAGGTCTACACTGCTGCCTACCAGA

>2 (A5SS, CEI & ES [Ex5])

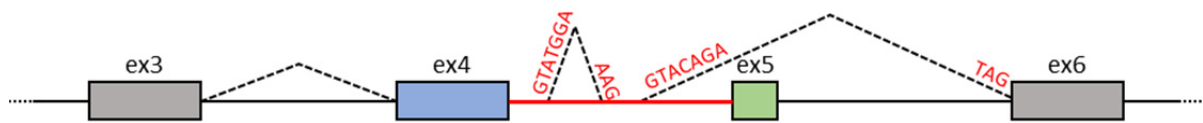

GCTACAGAGACCCCGCATTTAAAGCTGGGCCTGATGAACTTTGCAGATGAGTTTGCCAACTTC  
 AGGATTATCGACAAGCAGAGGTTGAAAGACTTGAAGCCAAAGTAGTTGAACCCTTGAAACTTA  
 TGGGACCATTGTGAAAATGAAACGGGATGACCTCAAAGCAACACTCACAGCAAGGAATCGAGAA  
 GCTAAGCAATTAACCTCAGTTAGAAAGAACACGTCAGCGAAACCCATCTGATCGACATGTTATTg  
 tctcctttgaatttgggtcttttaaaaaaatgtttaaggttgttactgccagctcagccagaaa  
 ccacatgaggagtggctctttgagagcatttgaggttcagaaacacctccattcctgaggggag  
 tctcttgagcagcgatttggggctgcgccagttgcttggctcttcttcttcttggaccaagGCA  
 GAAACGGAATTACAGAGAGCTGCAATGGATGCTAGCCGAACAAGTCGTCATCTGGAGGAACTA  
 TTAACAACCTTTGAAAGGCAGAAAATGAAGGATATAAAGACTATATTTTCTGAATTTATCACAAT  
 CGAAATGTTATTTACGGCAAAGCTTTAGAGGTCTACACTGCTGCCTACCAGA

>3 (A5SS & ES [Ex5])

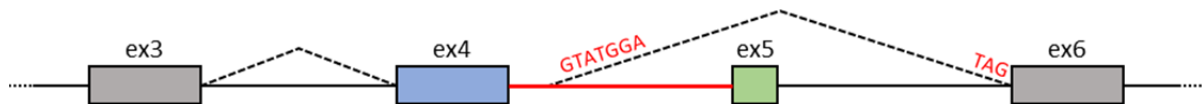

GCTACAGAGACCCCGCATTTAAAGCTGGGCCTGATGAACTTTGCAGATGAGTTTGCCAACTTC  
 AGGATTATCGACAAGCAGAGGTTGAAAGACTTGAAGCCAAAGTAGTTGAACCCTTGAAACTTA  
 TGGGACCATTGTGAAAATGAAACGGGATGACCTCAAAGCAACACTCACAGCAAGGAATCGAGAA  
 GCTAAGCAATTAACCTCAGTTAGAAAGAACACGTCAGCGAAACCCATCTGATCGACATGTTATTg  
 tctcctttgaatttgggtcttttaaaaaaatgtttaagGCAGAAACGGAATTACAGAGAGCTGCA  
 ATGGATGCTAGCCGAACAAGTCGTCATCTGGAGGAACTATTAACAACCTTTGAAAGGCAGAAA  
 TGAAGGATATAAAGACTATATTTTCTGAATTTATCACAATCGAAATGTTATTTACGGCAAAGC  
 TTTAGAGGTCTACACTGCTGCCTACCAGA

>4 (ES [Ex4 & Ex5])

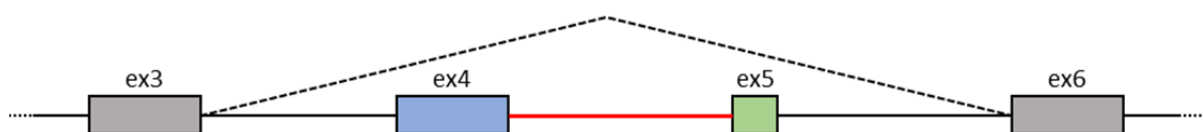

GCTACAGAGACCCCGCATTAAAGCTGGGCCTGATGAACTTTGCAGATGAGTTTGCCAACTTC  
 AGGATTATCGACAAGCAGAGGTTGAAAGACTTGAAGCCAAAGTAGTTGAACCCTTGAAAACCTTA  
 TGGGACCATTGTGAAAATGAAACGGGCAGAAACGGAATTACAGAGAGCTGCAATGGATGCTAGC  
 CGAACAAGTCGTCATCTGGAGGAACTATTAACAACCTTTGAAAGGCAGAAAATGAAGGATATAA  
 AACTATATTTTCTGAATTTATCACAATCGAAATGTTATTTACGGCAAAGCTTTAGAGGTCTA  
 CACTGCTGCCTACCAGA

**KRTCAP2**

>Normally spliced transcript (NM\_173852.4). Nucleotide sequence extends from exon 1 to exon 5.

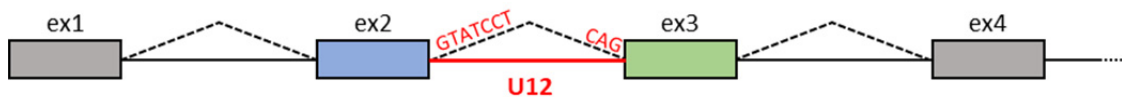

TTCAGCTCGCCTTTCTTGGCCAGAGGCGCCGGTTGGACTCACGGGCGGGGCATGATGGTGGTGG  
 GTACGGGCACCTCGCTGGCGCTCTCCTCCCTCCTGTCCCTGCTGCTCTTTGCTGGGATGCAGAT  
 GTACAGCCGTCAGCTGGCCTCCACCGAGTGGCTCACCATCCAGGGCGGCCTGCTTGGTTCGGGT  
 CTCTTCGTGTTCTCGCTCACTGCCTTCAATAATCTGGAGAATCTTGTCTTTGGCAAAGGATTCC  
 AAGCAAAGATCTTCCCTGAGATTCTCCTGTGCCTCCTGTTGGCTCTCTTTGCATCTGGCCTCAT  
 CCACCGAGTCTGTGTCACCACCTGC

>1 (CU12IR)

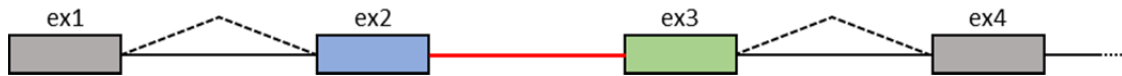

TTCAGCTCGCCTTTCTTGGCCAGAGGCGCCGGTTGGACTCACGGGCGGGGCATGATGGTGGTGG  
 GTACGGGCACCTCGCTGGCGCTCTCCTCCCTCCTGTCCCTGCTGCTCTTTGCTGGGATGCAGAT  
 GTACAGCCGTCAGCTGGCCTCCACCGAGTGGCTCACCATCCAGGGCGGCCTGCTTGGTTCGGGT  
 CTCTTCGTGTTCTCGCTCACTgtatcctcctgcagttggagggggcgggccacgtaggcatgt  
 gcccttccccttccccacacagctctgtcccgttgacaccctaactccttaactccctcaacc  
 agGCCTTCAATAATCTGGAGAATCTTGTCTTTGGCAAAGGATTCCAAGCAAAGATCTTCCCTGA  
 GATTCTCCTGTGCCTCCTGTTGGCTCTCTTTGCATCTGGCCTCATCCACCGAGTCTGTGTCACC  
 ACCTGC

**MARCHF6**

>Normally spliced transcript (NM\_005885.4). Nucleotide sequence extends from exon 7 to exon 16.

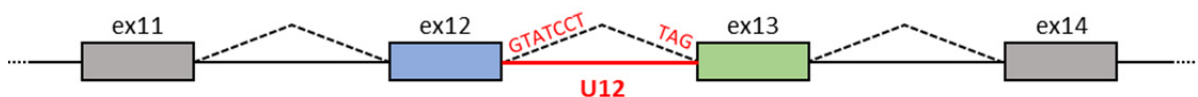

TAACCCACCAGCTGAGAACGCAGTGGTGGGGGAAAACCTGATGCCAGGATGACCAGGCAGAA  
 GAGGAGGAGGAGGACAATGAGGAGGAAGATGACGCTGGTGTGGAGGATGCGGCAGATGCTAATA  
 ACGGAGCCCAGGATGACATGAATTGGAATGCTTTAGAATGGGACCGAGCTGCTGAAGAGCTTAC  
 ATGGGAAAGAATGCTAGGACTTGATGGATCACTAGTTTTTCTGGAACATGTCTTCTGGGTGGTA



TCTTTAAATACACTGTTTCATTCTTGTGTTTTGCATTTTGGCCCTTACCATATTGGTCATTTCTCCC  
 TTGTTGGTTTGGGATTTGAAGAACACGTCCAAGCATCTCATTGTTGAAGGCCTAATCACAACCAT  
 AGTTGGGTATATACTTTTAGCAATAAACTGATAATTTGTCATGGCTTGGCAACTCTTGTGAAA  
 TTTCATAGATCTCGTCGCTTACTGGGAGTCTGCTATATTGTTGTTAAGGTCTCTTTGTTAGTGG  
 TGGTAGAAATTGGAGTATCCCTCTCATTGTTGGTTGGTGGCTGGATATCTGTTCCCTTGAAAT  
 GTTGTGATGCTACTCTGAAAGATCGAGAACTGAGCTTTCAGTCGGCTCCAGGTACTACCATGTTT  
 CTGCATTGGCTAGTGGGAATGGTATATGTCTTCTACTTTGCCTCCTTCATTCTACTACTGAGAG  
 AGGTACTTCGACCTGGTGTCTGTGGTTT

>1 (CU12IR)

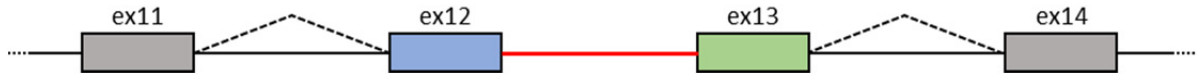

TAACCCACCAGCTGAGAACGCAGTGGTGGGGAAAACCCCTGATGCCCAGGATGACCAGGCAGAA  
 GAGGAGGAGGAGGACAATGAGGAGGAAGATGACGCTGGTGTGGAGGATGCGGCAGATGCTAATA  
 ACGGAGCCCAGGATGACATGAATTGGAATGCTTTAGAATGGGACCGAGCTGCTGAAGAGCTTAC  
 ATGGGAAAGAATGCTAGGACTTGATGGATCACTAGTTTTTCTGGAACATGTCTTCTGGGTGGTA  
 TCTTTAAATACACTGTTTCATTCTTGTGTTTTGCATTTTGGCCCTTACCATATTGGTCATTTCTCCC  
 TTGTTGGTTTGGGATTTGAAGAACACGTCCAAGCATCTCATTGTTGAAGGCCTAATCACAACCAT  
 AGTTGGGTATATACTTTTAGCAATAAACTGATAATTTGTCATgtatcctttaatgaaccaact  
 tgggtgtacactaatattattcataccaagaactcttcattaatggcgaaacttgtctatcct  
 tgtcctcttagtaaaagttgtaggtatttgcagtaagggtcagtgtggacaaaatgtgaaataa  
 attaattctgtcaaaaaataactaaatgttggctaagtagttacctgtttcattgtacctttaa  
 tactcagtttttcttgacctgatgctgtagGGCTTGGCAACTCTTGTGAAATTTTCATAGATCT  
 CGTCGCTTACTGGGAGTCTGCTATATTGTTGTTAAGGTCTCTTTGTTAGTGGTGGTAGAAATTG  
 GAGTATTCCCTCTCATTGTTGGTTGGTGGCTGGATATCTGTTCCCTTGAAATGTTTGTGATGCTAC  
 TCTGAAAGATCGAGAACTGAGCTTTCAGTCGGCTCCAGGTACTACCATGTTTCTGCATTGGCTA  
 GTGGGAATGGTATATGTCTTCTACTTTGCCTCCTTCATTCTACTACTGAGAGAGGTACTTCGAC  
 CTGGTGTCTGTGGTTT

**RABL2B**

>Normally spliced transcript (NM\_001130923.3). Nucleotide sequence extends from exon 3 to exon 7.

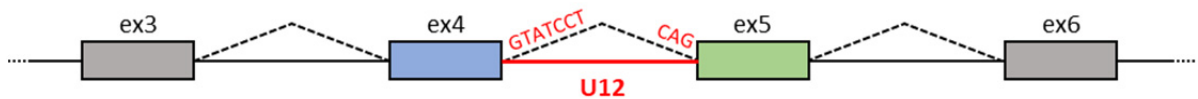

GATCATCTGCCTGGGAGACAGCGCAGTGGGCAAATCCAAACTCATGGAGAGATTTCTCATGGAT  
 GGCTTTCAGCCACAGCAGCTGTCCACGTACGCCCTGACCCTGTACAAGCACACAGCCACGGTAG  
 ATGGAAGGACCATCCTTGTGGACTTTTGGGACACGGCAGGCCAGGAGCGGTTCCAGAGCATGCA  
 TGCCTCCTACTACCACAAGGCCACGCCTGCATCATGGTGTGTTGA

>1 (CU12IR)

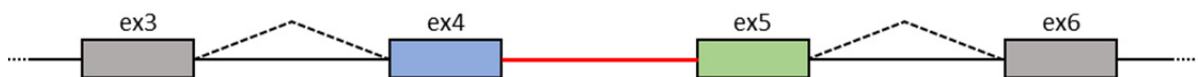

GATCATCTGCCTGGGAGACAGCGCAGTGGGCAAATCCAA**ACTCATGGAGAGATTTCTCATGGAT**  
**GGCTT**gtatccttcaagggttgaagtacccttgttctctgtgggtcttcccacgctcatgtatc  
 agtgtcccactgccacaccttgtaccagcagcccaggaaggaggattgggtaagtgaacgca  
 caggtttggttccgcacttgttcttggcgttgaccacatggcattgcacaatcagtgctgt  
 atatgttgacctaactcatatgttgattgtttatattaagagggcagtagaatggcaacag  
 caaatggtttgatctaatactgctggattcaaaccacctcctcctcctcagtagcttctgata  
 ctggccaagtcatthaacctcttaacctcaaagcttgggccccctactattgaaaaaatctc  
 tgatatgaatgaacttggtaaaataggagctgccagccccaccttctcccataaattgttata  
 ttacatagggttgagtgagttcctccccgcaactgggagatTTTTAACAGCTTCCAAGTGG  
 atccactgagaaccacaggtgagaggagcccctggagcctgctgctgctgctcctaggtcggc  
 acccaaggctcagttgccttaagatctgagatgtgttactccacctgtaccaagtgtcct  
 gcacaccagcccacctgcgtcatttggctctgctttttactgtccggcttcttgcagcctc  
 ggaagctgttaatccccagagttaaacccttttctcagggtttcacacatagacagactccaa  
 attgattgacagcttgtcagctgtatggcttgtgggagcttttgtccctggaatggcatgttg  
 ctacctagggttagggttctcttctagcctgcgaaagctccatccatgattgagttggggat  
 ccacatttgcatttccaactgcatgatgccttttatgacacttgtctgtaaaatcctgttctg  
 tgtttacctcagacttgcagtgccaggacacactcccacctcctcccaccctcacccttcca  
 tggagtttgtaccagtgatatgtgaagctgatcctctgtctgcaacattcatttgattaaaat  
 ctcaataactccaagagaagaggaggagaggatccatttcatcaaaccaaacaccctgtctc  
 cccactccttcttacctccccttttattgatttggctccttaacctgagtgcagTCAGCCACA  
 GCAGCTGTCCACGTACGCCCTGACCCTGTACAAGCACACAGCCACGGTAGATGGAAGGACCATC  
 CTTGTGG**ACTTTTGGGACACGGCAGGCCAGGAGCGGTTCCAGAGCATGCATGCCTCCTACTACC**  
**ACAAGGCCACGCCTGCATCATGGTGT**TTGA

>2 (A5SS & A3SS)

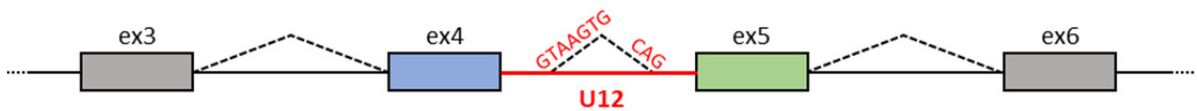

GATCATCTGCCTGGGAGACAGCGCAGTGGGCAAATCCAA**ACTCATGGAGAGATTTCTCATGGAT**  
**GGCTT**gtatccttcaagggttgaagtacccttgttctctgtgggtcttcccacgctcatgtatc  
 agtgtcccactgccacaccttgtaccagcagcccaggaaggaggattggacttgcagtgccca  
 ggacacactcccacctcctcccaccctcacccttccatggagtttgtaccagtgatatgtgaa  
 gctgatcctctgtctgcaacattcatttgatttaaaatctcaataactccaagagaagaggag  
 ggagaggatccatttcatcaaaccaaacaccctgtcccactccttcttacctcccctttt  
 attgatttggctccttaacctgagtgcagTCAGCCACAGCAGCTGTCCACGTACGCCCTGACCC  
 TGTACAAGCACACAGCCACGGTAGATGGAAGGACCATCCTTGTGG**ACTTTTGGGACACGGCAGG**  
**CCAGGAGCGGTTCCAGAGCATGCATGCCTCCTACTACCACAAGGCCACGCCTGCATCATGGTG**  
 TTTGA

SBNO1

>Normally spliced transcript (NM\_001167856.3). Nucleotide sequence extends from exon 7 to exon 12.

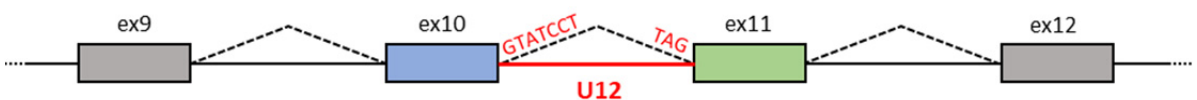

TATGCAGCCCAGCAACATGAAACTTTTCTACCTAATGGAGATCGTGCTGGCTTCTTAATAGGTG  
 ATGGTGCCGGTGTAGGAAAAGGAAGGACGATAGCAGGAATCATCTATGAAAATTATTTGTTGAG  
 TAGAAAACGAGCATTGTGGTTTAGTGTTTTCAAATGACTTAAAGTATGATGCTGAAAAGAGATTTA  
 AGGGATATTGGAGCAAAAAACATTTTGGTTCATTCGTTAAATAAGTTTAAATACGGAAAAATTT  
 CTCCAAACATAATGGGAGTGTGAAAAAGGGTGTATTTTTGCTACTTACTCTTCACTTATTGG  
 TGAAAGCCAGTCTGGCGGCAAGTATAAAACTAGGTTAAACAACCTTCTGCATTGGTGCGGTGAT  
 GACTTCGATGGAGTGATAGTGTTTGATGAGTGTGATAAAGCCAAAAACTTATGTCTCTGTTGGTT  
 CTTCAAAGCCAACCAAGACAGGCTTAGCAGTTTTAGAGCTTCAGAACAAATTGCCAAAAGCCAG  
 AGTTGTTTTATGCTAGTGCAACTGGTGCTTCTGAACCACGCAACATGGCCTATATGAACCGTCTT  
 GGCATATGGGGTGAGGGTA

>1 (CU12IR)

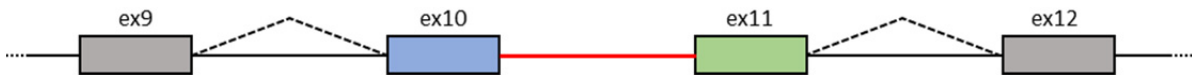

TATGCAGCCCAGCAACATGAAACTTTTCTACCTAATGGAGATCGTGCTGGCTTCTTAATAGGTG  
 ATGGTGCCGGTGTAGGAAAAGGAAGGACGATAGCAGGAATCATCTATGAAAATTATTTGTTGAG  
 TAGAAAACGAGCATTGTGGTTTAGTGTTTTCAAATGACTTAAAGTATGATGCTGAAAAGAGATTTA  
 AGGGATATTGGAGCAAAAAACATTTTGGTTCATTCGTTAAATAAGTTTAAATACGGAAAAATTT  
 CTCCAAACATAATGGGAGTGTGAAAAAGGGTGTATTTTTGCTACTTACTCTTCACTTATTGG  
 TGAAAGCCAGTCTGGCGGCAAGTATAAAACTAGGTTAAACAACCTTCTGCATTGGTGCGGTGAT  
 GACTTCGATGGAGTGgtatcctttatggcaaatatTTTTctatTTTTtaacgacaagaaaatta  
 taaaagggtagacctttgggaaacaggaatcttgagattaacgagttgctggagtgaaaactt  
 taatgattacctagagtccaagggttggaagtggattcggTTTTtacctgtcagatagga  
 gaccaatgtttaatctcctggtttagaaaaatgtaaatagatatgaggaatactgaatactgta  
 tccccTTTTgaggattaacattgcatattacatagcagaatacccgagaagactaagtgaaa  
 gaaactgttagaacttagtggtcccaacttggtcacagtatatctTTtaactgtcctgcatg  
 agaacatcactTTTTgaaatgctgattaagttgggttaccaatcatgcttctactTTtacaagt  
 taccagataacaacttcttgctgcagtggttctTTTTctctgTTTTaatttagaggcaattgc  
 tggTTTTaaattccaattcagtgaatgtctttgaggctagagagggaggaggatgtaactgggg  
 aaaggccataggacttctttgtatTTgcagtcatgaaataggcaatcagaaggcctcagga  
 aataaaagTTaactcttcttgaaagactggagattcttacttaataactaatgtgatacattcct  
 taactcattccatttagATAGTGTTTGATGAGTGTGATAAAGCCAAAAACTTATGTCTCTGTTGG  
 TTCTTCAAAGCCAACCAAGACAGGCTTAGCAGTTTTAGAGCTTCAGAACAAATTGCCAAAAGCC  
 AGAGTTGTTTTATGCTAGTGCAACTGGTGCTTCTGAACCACGCAACATGGCCTATATGAACCGTC  
 TTGGCATATGGGGTGAGGGTA

SLC12A4

>Normally spliced transcript (NM\_005072.5). Nucleotide sequence extends from exon 9 to exon 12

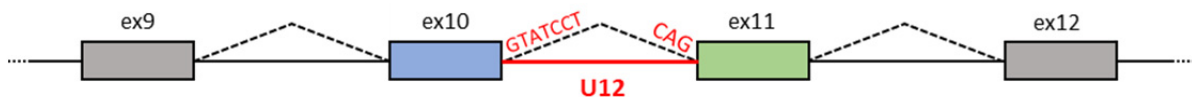

AAGGAGAGCCTGCCTCTGTACGTGGTTCGCTGACATCGCCACATCCTTCACCGTGCTGGTCCGCA  
 TCTTCTTCCCTTCTGTAACAGGCATCATGGCTGGCTCAAACCGCTCTGGGGACCTTCGTGACGC  
 CCAGAAGTCTATCCCTGTGGGGACCATTCTGGCCATCATTACAACCTCCCTCGTGTACTTCAGC

AGTGTGGTTCTCTTTGGTGCCTGCATTGAGGGTGTGGTTCTCCGGGACAAGTATGGCGATGGTG  
TCAGCAGGAACT

>1 (CU12IR)

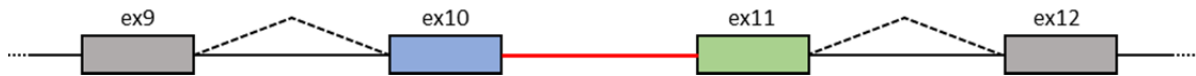

AAGGAGAGCCTGCCTCTGTACGTGGTGCCTGACATCGCCACATCCTTCACCGTGCTGGTCGGCA  
TCTTCTTCCCTTCTGTAACAGGCATCATGGCTGGCTCAAACCGCTCTGGGGACCTTCGTGACGC  
CCAGAAGTCTATCCCTGTGGGGACCATTCTGGCCATCATTACAACCTCCCTCGTGTgtatcctt  
tcccaggcctggggcaggtggggcagaggacgggaagcgcttggcctgtgtacgcttggcaggtc  
acatgcacagacacccccacacactcatatatagctccccttctcatgcacacatgcacatacac  
accacgagactcccagctgtaggtgtcctggtagctctggctgggggtgggggcagctggtactat  
tcagggacagtggggtggcagaggccgagtttctcttgacgcgcgcgagACTTCAGCAGTGTG  
GTTCTCTTTGGTGCCTGCATTGAGGGTGTGGTTCTCCGGGACAAGTATGGCGATGGTGTCAGCA  
GAACT

### ZC3H8

>Normally spliced transcript (NM\_032494.3). Nucleotide sequence extends from exon 4 to exon 9.

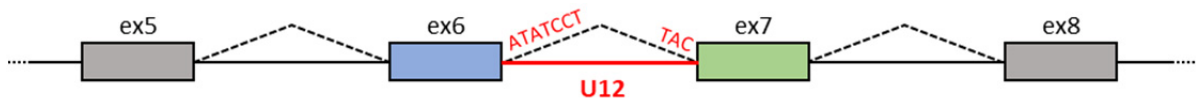

GCTGGTCACAAGAATGGCAAACAGAAGAAAAATGAAGCGAAAAATGGCCTGGCCCTGGAAACAAAG  
GATCAAATGCTTTGCTGAGGAACAGCGGCTCACAGGAAGAGGATGGTAAACCTAAAGAGAAGCA  
GCAGCATTGAGTCAGGCATTCATCAACCAACATACAGTGAACGCAAGGGAAAACAAATTTGT  
AAATATTTTCTTGAAAGGAAATGTATTAAGGGAGACCAGTGTAAATTTGATCATGATGCAGAGA  
TAGAAAAGAAAAAGGAAATGTGTAAGTTTTATGTACAAGGATATTGTACCAGAGGTGAAAACCTG  
TCTGTATTTGCATAATGAATATCCTTGTAAAGTTTTACCATACAGGAACAAAATGTTATCAGGGA  
GAATACTGCAAGTTTTCTCATGCTCCACTGACTCCTGAAACACAAGAATTGTTGGCTAAAGTTT  
TGGATACTGAAAAGAAGTCATGTAATAAAAATAGACATAAAAAGGTAGCAATGTACAGATAAAG  
AGTACTTTAACGCCCATGCGTGTTCAGACTGT

>1 (A5SS & A3SS)

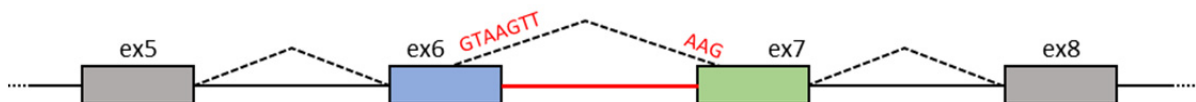

GCTGGTCACAAGAATGGCAAACAGAAGAAAAATGAAGCGAAAAATGGCCTGGCCCTGGAAACAAAG  
GATCAAATGCTTTGCTGAGGAACAGCGGCTCACAGGAAGAGGATGGTAAACCTAAAGAGAAGCA  
GCAGCATTGAGTCAGGCATTCATCAACCAACATACAGTGAACGCAAGGGAAAACAAATTTGT  
AAATATTTTCTTGAAAGGAAATGTATTAAGGGAGACCAGTGTAAATTTGATCATGATGCAGAGA  
TAGAAAAGAAAAAGGAAATGTTTTTACCATACAGGAACAAAATGTTATCAGGGAGAACTACTGCA  
AGTTTTTCTCATGCTCCACTGACTCCTGAAACACAAGAATTGTTGGCTAAAGTTTTGGATACTGA  
AAAGAAGTCATGTAATAAAAATAGACATAAAAAGGTAGCAATGTACAGATAAAGAGTACTTTAA  
CGCCCATGCGTGTTCAGACTGT
